# Supplementary material for: TFPI from erythroblasts drives heme production in central macrophages promoting erythropoiesis in polycythemia
Source: PubMed Central journal article supplement (PMC11087540; doi:10.1038/s41467-024-48328-8), 2024-05-10
Supplement: 41467_2024_48328_MOESM1_ESM.pdf [file 41467_2024_48328_MOESM1_ESM.pdf]

## Supplemental Figures

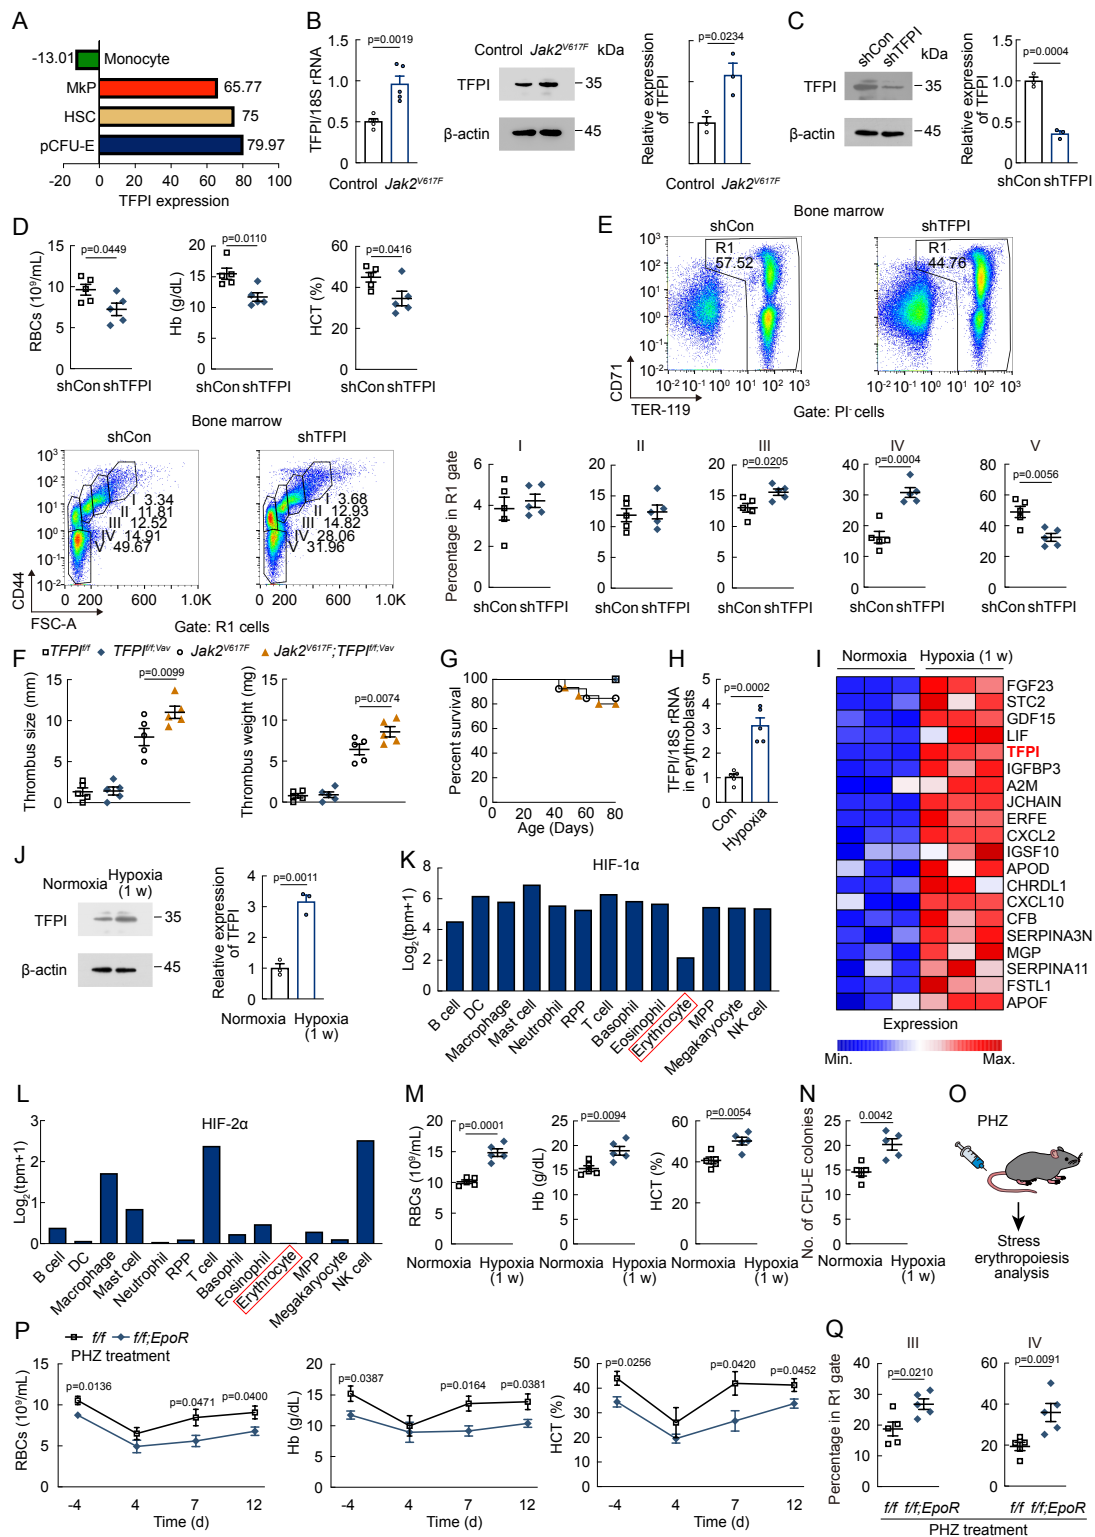

**Figure S1 TFPI affects erythropoiesis in mice.**

(A) Expression of TFPI mRNA in mouse BM cells. Data from Gene Expression Commons. Numbers next to bars indicate expression level. (B) TFPI expression in

Ter119<sup>+</sup> cells of *Jak2*<sup>V617F</sup>-mutated mice (RT-qPCR, n = 5; Western blot, n = 3). (C) TFPI protein expression of Ter119<sup>+</sup> cells after TFPI shRNA treatment (n = 3). (D) PB RBC numbers, Hb, and HCT in shTFPI-treated mice (n = 5). (E) Frequency of erythroblast populations among BM cells in shTFPI-treated mice (n = 5). (F) Thrombus size and weight in *TFPI*<sup>f/f</sup> mice, *Jak2*<sup>V617F</sup>-mutated mice, *TFPI*<sup>f/f;Vav</sup> mice, and *Jak2*<sup>V617F</sup>;*TFPI*<sup>f/f;Vav</sup> mice after IVC flow restriction (n = 5). (G) Kaplan-Meier survival analysis of *TFPI*<sup>f/f</sup> mice (n = 10), *Jak2*<sup>V617F</sup>-mutated mice (n = 13), *TFPI*<sup>f/f;Vav</sup> mice (n = 10), and *Jak2*<sup>V617F</sup>;*TFPI*<sup>f/f;Vav</sup> mice (n = 15). (H) TFPI mRNA expression in erythroblasts of human EBI after exposed to hypoxia (n = 5). (I) Heatmap showing the top 20 up-regulated secreted protein gene expression in BM cells of hypoxia-exposed mice. (J) TFPI expression in Ter119<sup>+</sup> cells of hypoxia-exposed mice (n = 5). (K) HIF-1 $\alpha$  mRNA levels of different cell lineages in BM based on Haemosphere (<https://www.haemosphere.org>). (L) HIF-2 $\alpha$  mRNA levels of different cell lineages in BM based on Haemosphere. (M) PB RBC numbers, Hb, and HCT in hypoxia-exposed mice (n = 5). (N) CFU-E number in hypoxia-exposed mice (n = 5). (O) Protocol used for PHZ treatment. (P) PB RBC numbers, Hb and HCT in *TFPI*<sup>f/f;EpoR</sup> mice undergoing PHZ-induced stress erythropoiesis (n = 5). (Q) Frequency of RIII and RIV erythroblast populations in *TFPI*<sup>f/f;EpoR</sup> mice 6 d after PHZ treatment (n = 5). Statistical analysis was performed using one-way ANOVA (B-F, H, J, M-N, and P-Q). Data are shown as mean  $\pm$  SEM and are representative of two (D-G and M-Q) or three (B, C, and J) independent experiments. Source data are provided as a Source Data file.

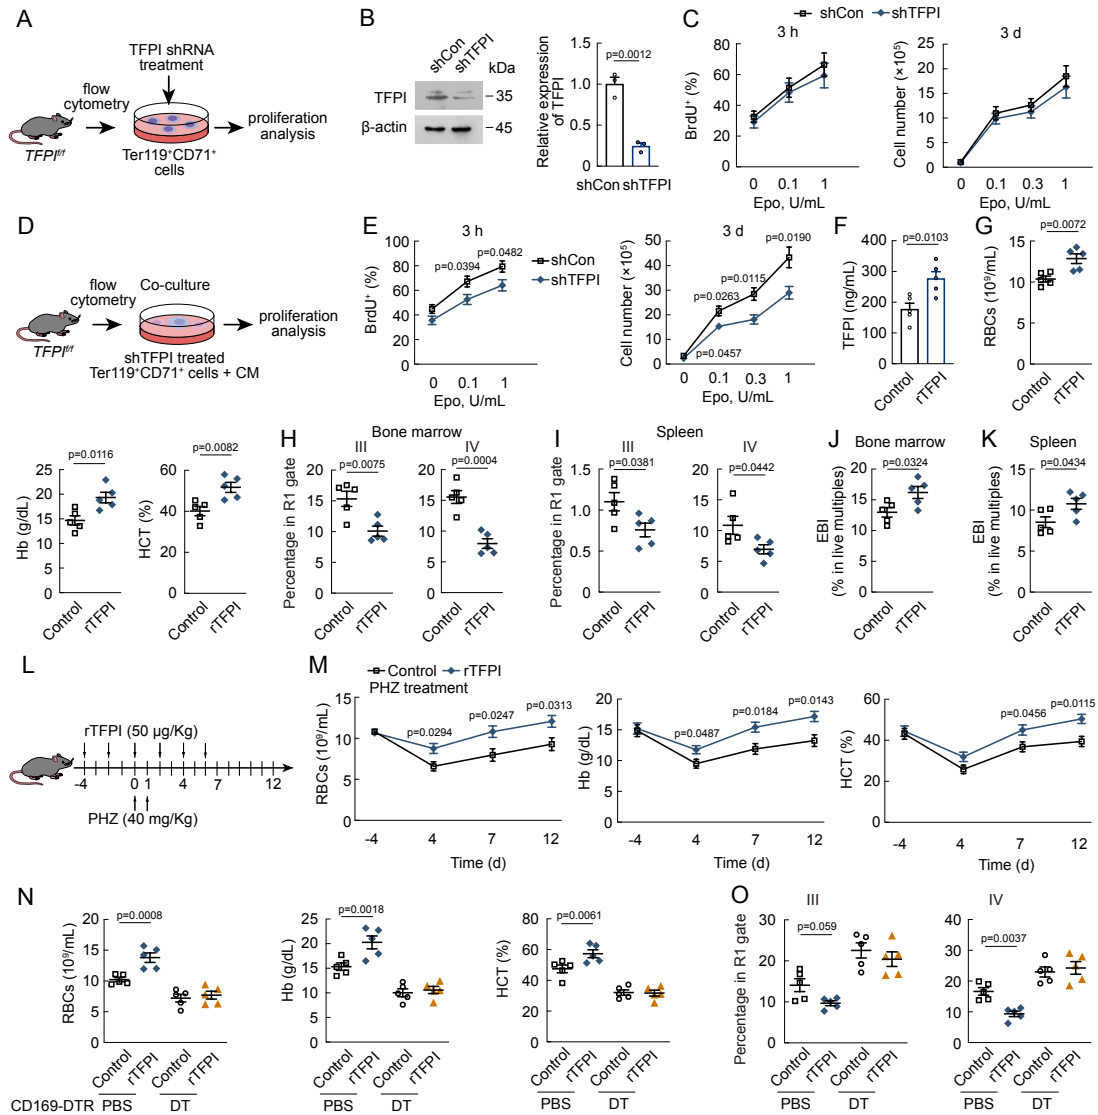

**Figure S2 TFPI treatment improves erythropoiesis.**

(A) Schematic diagram of *in vitro* cultivation and proliferation of Ter119<sup>+</sup>CD71<sup>+</sup> cells. (B) TFPI protein expression of Ter119<sup>+</sup>CD71<sup>+</sup> cells after TFPI shRNA treatment (n = 3). (C) The expansion of Ter119<sup>+</sup>CD71<sup>+</sup> cells after TFPI shRNA treatment (n = 5). (D) Schematic diagram of proliferation of Ter119<sup>+</sup>CD71<sup>+</sup> cells during co-culture with F4/80<sup>+</sup>CD169<sup>+</sup>Vcam-1<sup>+</sup> macrophages *in vitro*. (E) The expansion of Ter119<sup>+</sup>CD71<sup>+</sup> cells treated with TFPI shRNA during co-culture with F4/80<sup>+</sup>CD169<sup>+</sup>Vcam-1<sup>+</sup> macrophages (n = 5). (F) The plasma TFPI concentration of rTFPI-treated mice (n = 5). (G) PB RBC numbers, Hb, and HCT in rTFPI-treated mice (n = 5). (H) Frequency of RIII and RIV erythroblast populations of BM in rTFPI-treated mice (n = 5). (I)

Frequency of RIII and RIV erythroblast populations of spleen in rTFPI-treated mice (n = 5). (J) EBI numbers in the BM of rTFPI-treated mice (n = 5). (K) EBI numbers in the spleen of rTFPI-treated mice (n = 5). (L) Experimental scheme for PHZ-induced stress erythropoiesis. (M) PB RBC numbers, Hb, and HCT in rTFPI-treated mice undergoing PHZ-induced stress erythropoiesis (n = 5). (N) PB RBC numbers, Hb, and HCT in CD169<sup>DTR/+</sup> mice after DT and rTFPI treatment (n = 5). (O) Frequency of RIII and RIV erythroblast populations of BM in CD169<sup>DTR/+</sup> mice after DT and rTFPI treatment (n = 5). Statistical analysis was performed using one-way ANOVA (B, E-K, and M-O). Data are shown as mean ± SEM and are representative of two (F-K and M-O) or three (B, C, and E) independent experiments. Source data are provided as a Source Data file.



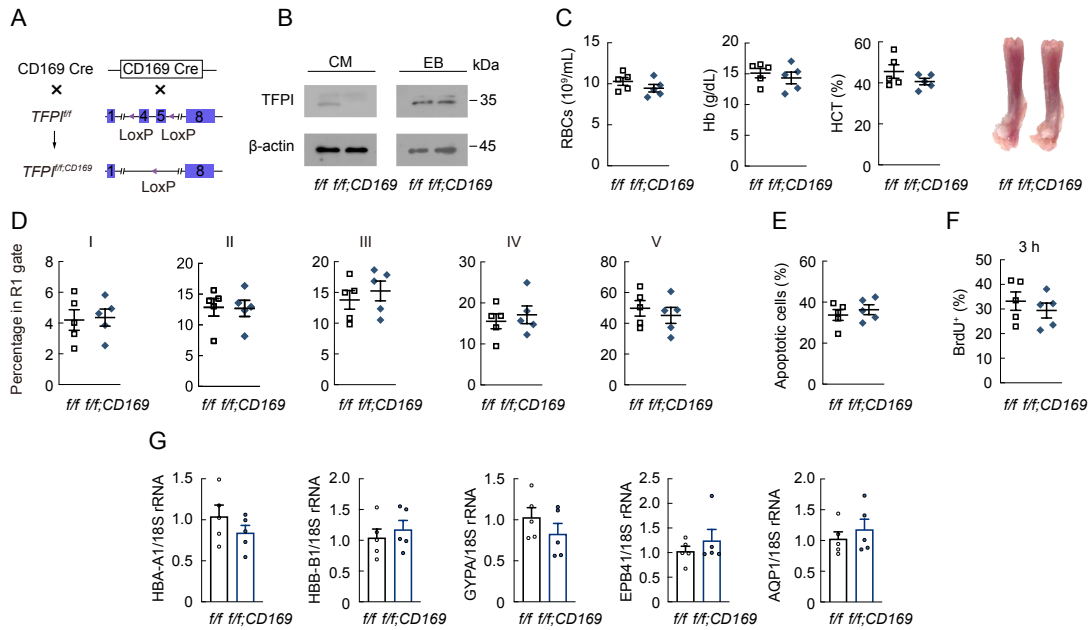

**Figure S3 Macrophage-specific TFPI knockout does not affect erythropoiesis in mice.**

(A) Protocol used to prepare *TFPI<sup>fl/fl;CD169</sup>* mice. (B) TFPI protein expression in CM and erythroblasts of *TFPI<sup>fl/fl;CD169</sup>* mice (n = 3). (C) PB RBC numbers, Hb, and HCT in *TFPI<sup>fl/fl;CD169</sup>* mice (n = 5). (D) Frequency of erythroblast populations among BM cells in *TFPI<sup>fl/fl;CD169</sup>* mice (n = 5). (E) Frequency of apoptotic erythroblasts among BM cells in *TFPI<sup>fl/fl;CD169</sup>* mice (n = 5). (F) BrdU incorporation assay for erythroblasts proliferation of *TFPI<sup>fl/fl;CD169</sup>* mice (n = 5). (G) HBA-A1, HBB-B1, GYPA, EPB41 and AQP1 mRNA expression in erythroblasts among BM cells of *TFPI<sup>fl/fl;CD169</sup>* mice (n = 5). Data are shown as mean ± SEM and are representative of two (C and D) or three (B, E-G) independent experiments. Source data are provided as a Source Data file.

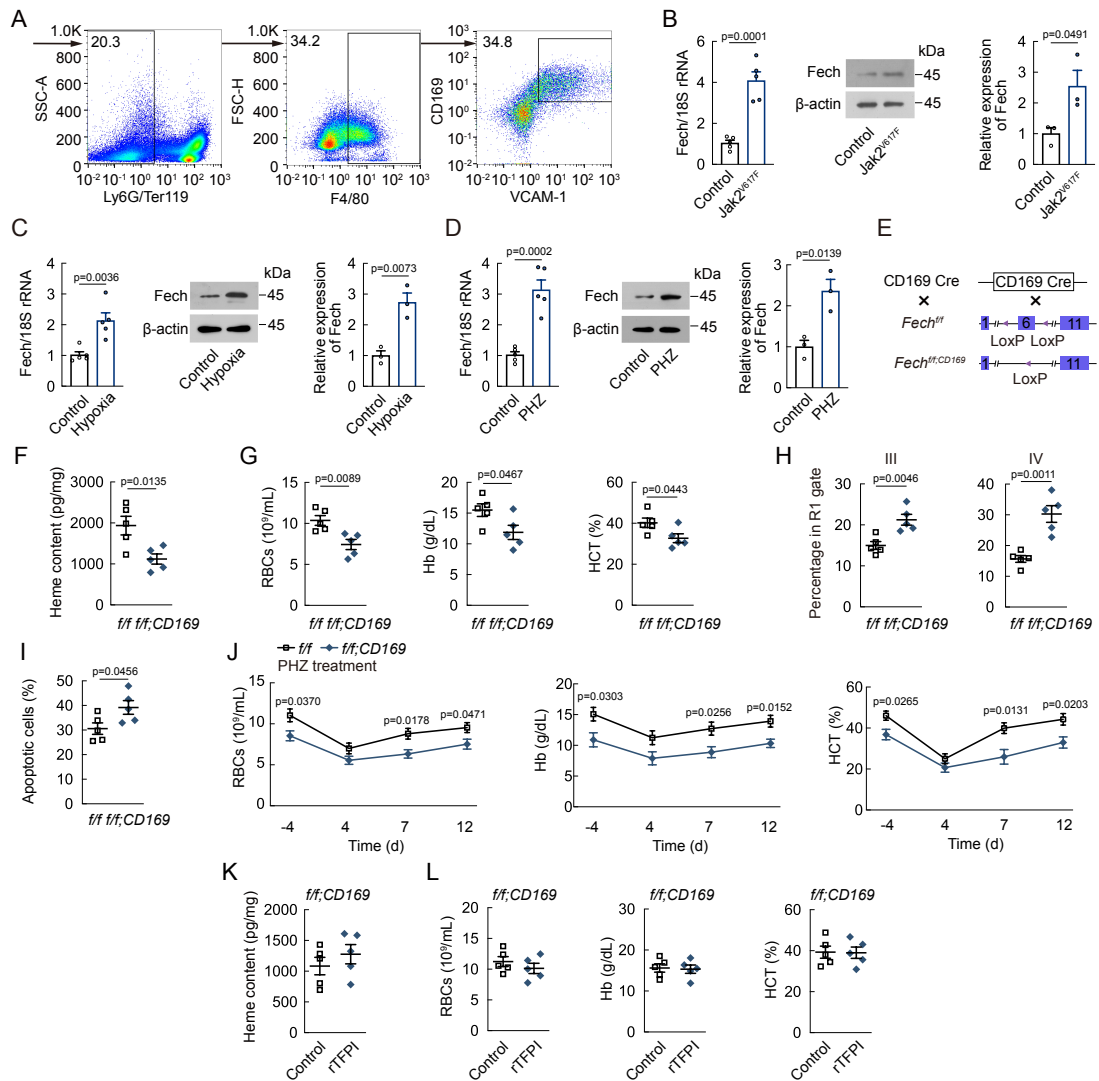

**Figure S4 Heme in F4/80<sup>+</sup>CD169<sup>+</sup>Vcam-1<sup>+</sup> macrophages improves erythropoiesis.**

(A) Representative FACS plots of the F4/80<sup>+</sup>CD169<sup>+</sup>Vcam-1<sup>+</sup> macrophage gating strategy. (B) Fech expression in F4/80<sup>+</sup>CD169<sup>+</sup>Vcam-1<sup>+</sup> macrophages of *Jak2*<sup>V617F</sup>-mutated mice (RT-qPCR, n = 5; Western blot, n = 3). (C) Fech expression in F4/80<sup>+</sup>CD169<sup>+</sup>Vcam-1<sup>+</sup> macrophages of hypoxia-exposed mice (RT-qPCR, n = 5; Western blot, n = 3). (D) Fech expression in F4/80<sup>+</sup>CD169<sup>+</sup>Vcam-1<sup>+</sup> macrophages of PHZ-treated mice (RT-qPCR, n = 5; Western blot, n = 3). (E) Protocol to prepare *Fech*<sup>ff;CD169</sup> mice. (F) Heme content in F4/80<sup>+</sup>CD169<sup>+</sup>Vcam-1<sup>+</sup> macrophages of *Fech*<sup>ff;CD169</sup> mice (n = 5). (G) PB RBC numbers, Hb, and HCT in *Fech*<sup>ff;CD169</sup> mice (n = 5). (H) Frequency of RIII and RIV erythroblast populations in *Fech*<sup>ff;CD169</sup> mice (n =

5). (I) Frequency of apoptotic erythroblasts among BM cells in *Fech<sup>ff</sup>;CD169* mice (n = 5). (J) PB RBC numbers, Hb, and HCT in *Fech<sup>ff</sup>;CD169* mice after PHZ treatment (n = 5). (K) Heme content in F4/80<sup>+</sup>CD169<sup>+</sup>Vcam-1<sup>+</sup> macrophages of *Fech<sup>ff</sup>;CD169* mice after rTFPI treatment (n = 5). (L) PB RBC numbers, Hb, and HCT in *Fech<sup>ff</sup>;CD169* mice after rTFPI treatment (n = 5). Statistical analysis was performed using one-way ANOVA (B-D, and F-L). Data are shown as mean ± SEM and are representative of two (F-L) or three (B-D) independent experiments. Source data are provided as a Source Data file.

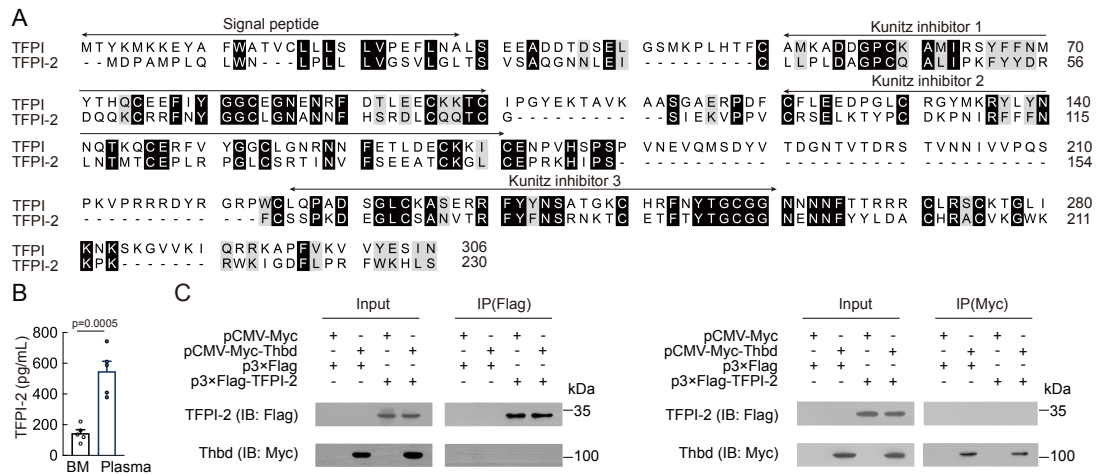

**Figure S5 Thbd does not interact with TFPI-2.**

(A) Multiple alignment of the amino acid sequences of TFPI and TFPI-2 in mice. (B) TFPI-2 protein expression in BM and plasma (n = 5). (C) Co-IP analysis of the interaction between Thbd and TFPI-2 in HEK293T cells (n = 2). Statistical analysis was performed using one-way ANOVA (B). Data are shown as mean ± SEM and are representative of two (C) or three (B) independent experiments. Source data are provided as a Source Data file.

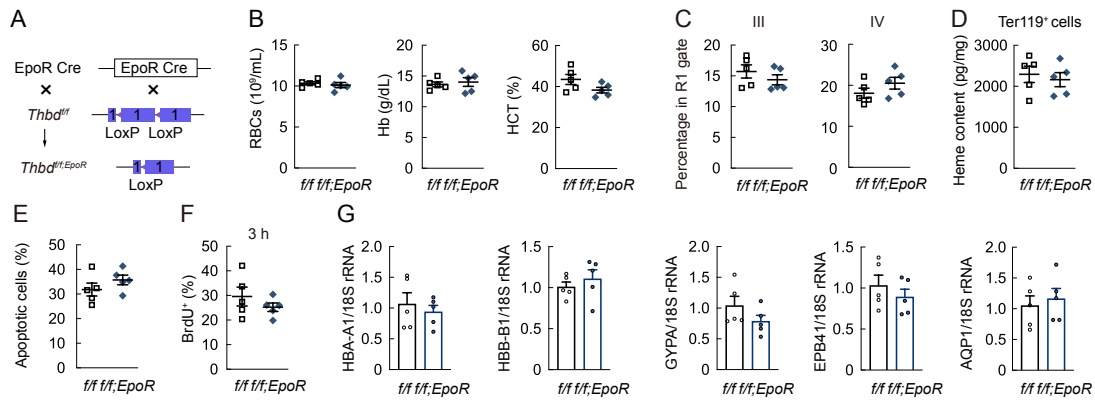

**Figure S6 Erythroid-specific *Thbd* knockout does not affect erythropoiesis in mice.**

(A) Protocol used to prepare *Thbd*<sup>fl/fl</sup>;*EpoR* mice. (B) PB RBC numbers, Hb, and HCT in *Thbd*<sup>fl/fl</sup>;*EpoR* mice (n = 5). (C) Frequency of erythroblast populations among BM cells in *Thbd*<sup>fl/fl</sup>;*EpoR* mice (n = 5). (D) Heme content in Ter119<sup>+</sup> cells of *Thbd*<sup>fl/fl</sup>;*EpoR* mice (n = 5). (E) Frequency of apoptotic erythroblasts among BM cells in *Thbd*<sup>fl/fl</sup>;*EpoR* mice (n = 5). (F) BrdU incorporation assay for erythroblasts proliferation of *Thbd*<sup>fl/fl</sup>;*EpoR* mice (n = 5). (G) HBA-A1, HBB-B1, GYPA, EPB41 and AQP1 mRNA expression in erythroblasts among BM cells of *Thbd*<sup>fl/fl</sup>;*EpoR* mice (n = 5). Data are shown as mean ± SEM and are representative of two (B-D) or three (E-G) independent experiments. Source data are provided as a Source Data file.

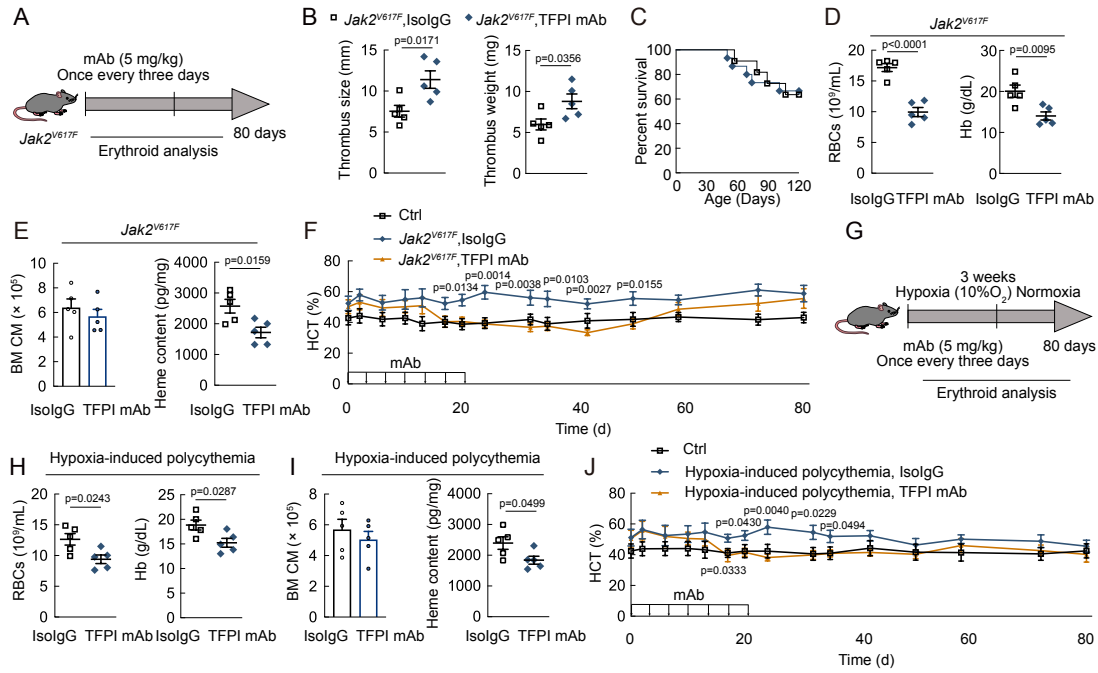

**Figure S7 Effects of anti-TFPI antibody on hypoxia- and  $Jak2^{V617F}$ -induced polycythemia.**

(A) Schematic of experimental design for TFPI mAb treatment of  $Jak2^{V617F}$ -mutated mice. (B) Thrombus size and weight in  $Jak2^{V617F}$ -mutated mice and TFPI mAb-treated  $Jak2^{V617F}$ -mutated mice after IVC flow restriction. (C) Kaplan-Meier survival analysis of  $Jak2^{V617F}$ -mutated mice (n = 11) and TFPI mAb-treated  $Jak2^{V617F}$ -mutated mice (n = 15). (D) PB RBC numbers and Hb in  $Jak2^{V617F}$ -mutated mice after TFPI mAb treatment (n = 5). (E) The numbers of F4/80<sup>+</sup>CD169<sup>+</sup>Vcam-1<sup>+</sup> macrophages per femur and F4/80<sup>+</sup>CD169<sup>+</sup>Vcam-1<sup>+</sup> macrophage heme content of  $Jak2^{V617F}$ -mutated mice after TFPI mAb treatment (n = 5). (F) HCT in control and  $Jak2^{V617F}$ -mutated mice after treated with IsoIgG and TFPI mAb (n = 5). (G) Schematic of experimental design for construction of a mouse model of hypoxia-induced polycythemia. (H) PB RBC numbers and Hb in hypoxia-induced polycythemia mice after TFPI mAb treatment for 3 weeks (n = 5). (I) The numbers of F4/80<sup>+</sup>CD169<sup>+</sup>Vcam-1<sup>+</sup> macrophages per femur and F4/80<sup>+</sup>CD169<sup>+</sup>Vcam-1<sup>+</sup> macrophage heme content of hypoxia-induced

polycythemia mice after TFPI mAb treatment for 3 weeks (n = 5). (J) HCT in control and hypoxia-induced polycythemia mice after treated with IsoIgG and TFPI mAb (n = 5). Statistical analysis was performed using one-way ANOVA (B,D-F, and H-J). Data are shown as mean  $\pm$  SEM and are representative of two independent experiments. Source data are provided as a Source Data file.

## Supplemental Tables

**Supplementary Table 1.** The list of candidate TFPI-interacting proteins identified by yeast-two-hybrid analyses.

| Ensembl            | Positive gene identified | positive clones/total identical clones |
|--------------------|--------------------------|----------------------------------------|
| ENSMUSG00000031444 | F10                      | 3/30                                   |
| ENSMUSG00000074743 | Thbd                     | 8/30                                   |
| ENSMUSG00000055436 | Srsf11                   | 15/30                                  |
| ENSMUSG00000027249 | F2                       | 1/30                                   |
| ENSMUSG00000024097 | Srsf7                    | 17/30                                  |
| ENSMUSG00000022961 | Son                      | 18/30                                  |

**Supplementary Table 2.** Characteristics of patient and healthy cohorts.

|                                  | healthy cohorts | patient cohorts |
|----------------------------------|-----------------|-----------------|
| Number of patient/healthy cohort | 18              | 21              |
| Male                             | 7               | 10              |
| Female                           | 11              | 11              |
| Median age for samples (years)   | 40              | 37              |

**Supplementary Table 3.** Primers used for RT-qPCR.

| RT-qPCR |                                                                            |
|---------|----------------------------------------------------------------------------|
| Genes   | Primers                                                                    |
| Mouse   |                                                                            |
| TFPI    | Forward 5'CCTTCCCCAGTGAATGAGGT3'<br>Reverse 5'ATCCACTGTCTGCTGGTTGA3'       |
| Fech    | Forward 5'TGACCACATTGAGACGCTCT3'<br>Reverse 5'GCTTGTTGGACTGGATGTGG3'       |
| Thbd    | Forward 5'GGCTGGAGATGACCCAGATA3'<br>Reverse 5'GAAACAACGGTAAGGGCAAA3'       |
| CD71    | Forward 5'AGCCAGATCAGCATTCTCTAACT3'<br>Reverse 5'GCCTTCATGTTATTGTTCGGCAT3' |
| ALAS2   | Forward 5'CACCTATGCTTAAGGAGCCA3'                                           |



|              |                                                                         |
|--------------|-------------------------------------------------------------------------|
| ALAD         | Reverse 5' CAGAAGCACACAGGAAAGCA3'<br>Forword 5' GTTCTGCACAGCGGCTACTT3'  |
| HMBS         | Reverse 5' AGCTGGTTTACGCCATACCTG3'<br>Forword 5' AAGGGCTTTTCTGAGGCACC3' |
| UROS         | Reverse 5' AGTTGCCCATCTTTCATCACTG3'<br>Forword 5' GCAGTGAAGCTGTGTTTGA3' |
| UROD         | Reverse 5' GCAAGCTTTTCTGCATTTCC3'<br>Forword 5' CCTCTGGATGCTGCCATAAT3'  |
| CPOX         | Reverse 5' TAAGGGTGATGGCTTGGAAC3'<br>Forword 5' ATGCCCTTCTTGGGAACTTT3'  |
| PC           | Reverse 5' TAGCCCTGGCTGGACTAGAA3'<br>Forword 5' GGTGCTCATCCACACTTCCT3'  |
| TF           | Reverse 5' GCAGATGGGCACTATGGTTT3'<br>Forword 5' TGCTTCTCGACCACAGACAC3'  |
|              | Reverse 5' TAAAACTTTGGGGCGTTTG3'                                        |
| <b>Human</b> |                                                                         |
| TFPI         | Forword 5' ATGGAACCCAGCTCAATGCT3'<br>Reverse 5' GGCACGACACAATCCTCTGT3'  |
| Thbd         | Forword 5' ACATCCTGGACGACGGTTTC3'<br>Reverse 5' CGCAGATGCACTCGAAGGTA3'  |
| TF           | Forword 5' AGACAGCCCGGTAGAGTGTA3'<br>Reverse 5' AGCCAGGATGATGACAAGGAT3' |
| Fech         | Forword 5' TTGTTCTCTAAGGCCCTGGC3'<br>Reverse 5' GCGGACAGCTCAGGGTCA3'    |

**Supplementary Table 4.** Target sequences for shRNA.

| <b>shRNA</b>      |                                |
|-------------------|--------------------------------|
| Lentivirus        | Sequences                      |
| Mouse TFPI shRNA  | 5' CCATGCAAAGCAATGATAAGGAGTT3' |
| Human TFPI shRNA  | 5' ACAGTGTGAACGTTTCAAGTA3'     |
| Mouse GATA1 shRNA | 5' GAGGAAATGGAGGAGGCCTTGAAGA3' |
| Mouse Thbd shRNA  | 5' GCCCACATCTCTAGTACCTACAACA3' |
| Mouse aPC shRNA   | 5' CATGCGCTGCAAGTCCACTGTGAAT3' |
